# Supplementary material
Source: PubMed Central journal article supplement (PMC5015705)
Supplement: NIHMS69803-supplement-Tables_E1_to_E3.pdf [file NIHMS69803-supplement-Tables_E1_to_E3.pdf]

**TABLE E1.** Associations between prevalence of infections with sIgE levels, skin reactivity (SPT responses) to aeroallergens, current wheeze, current wheeze plus symptoms, and asthma ever in life in children 4 to 5 years old (n = 311)

| Infections            | sIgE level $\geq 0.70$ kU/L* |                  | Positive SPT response* |                         | Current wheeze |                         | Current wheeze plus symptoms |                  | Asthma ever in life |                          |
|-----------------------|------------------------------|------------------|------------------------|-------------------------|----------------|-------------------------|------------------------------|------------------|---------------------|--------------------------|
|                       | No. (%)                      | OR (95% CI)†     | No. (%)                | OR (95% CI)†            | No. (%)        | OR (95% CI)†            | No. (%)                      | OR (95% CI)†     | No. (%)             | OR (95% CI)†             |
| <i>T gondii</i>       |                              |                  |                        |                         |                |                         |                              |                  |                     |                          |
| Yes (n = 44 [14.1%])  | 16 (36.4)                    | 1                | 12 (27.3)              | 1                       | 21 (47.7)      | 1                       | 23 (52.3)                    | 1                | 6 (13.6)            | 1                        |
| No (n = 267 [85.9%])  | 100 (37.5)                   | 1.18 (0.59-2.34) | 77 (28.8)              | 1.15 (0.55-2.40)        | 88 (33.0)      | 0.65 (0.34-1.27)        | 112 (41.9)                   | 0.56 (0.29-1.09) | 19 (7.1)            | 0.35 (0.12-1.01)         |
| <i>H pylori</i>       |                              |                  |                        |                         |                |                         |                              |                  |                     |                          |
| Yes (n = 68 [21.9%])  | 32 (47.1)                    | 1                | 20 (29.4)              | 1                       | 25 (36.8)      | 1                       | 32 (47.1)                    | 1                | 1 (1.5)             | <b>1</b>                 |
| No (n = 243 [78.1%])  | 84 (34.6)                    | 0.60 (0.35-1.04) | 69 (28.4)              | 0.95 (0.53-1.73)        | 84 (34.6)      | 0.83 (0.48-1.44)        | 103 (42.4)                   | 0.94 (0.53-1.66) | 24 (9.9)            | <b>9.16 (1.18-71.08)</b> |
| Hepatitis A virus     |                              |                  |                        |                         |                |                         |                              |                  |                     |                          |
| Yes (n = 44 [14.1%])  | 15 (34.1)                    | 1                | 16 (36.4)              | 1                       | 15 (34.1)      | 1                       | 19 (43.2)                    | 1                | 5 (11.3)            | 1                        |
| No (n = 267 [85.9%])  | 101 (37.8)                   | 1.31 (0.65-2.61) | 73 (27.3)              | 0.65 (0.33-1.31)        | 94 (35.2)      | 0.99 (0.51-1.93)        | 116 (43.4)                   | 1.11 (0.55-2.23) | 20 (7.5)            | 0.43 (0.14-1.34)         |
| Herpes zoster virus   |                              |                  |                        |                         |                |                         |                              |                  |                     |                          |
| Yes (n = 103 [33.1%]) | 31 (30.1)                    | 1                | 30 (29.1)              | 1                       | 36 (35.0)      | 1                       | 45 (43.7)                    | 1                | 9 (8.7)             | 1                        |
| No (n = 208 [66.9%])  | 85 (40.9)                    | 1.64 (0.98-2.73) | 59 (28.4)              | 0.97 (0.58-1.64)        | 73 (35.1)      | 1.02 (0.63-1.65)        | 90 (43.3)                    | 1.07 (0.65-1.78) | 16 (7.7)            | 0.92 (0.38-2.23)         |
| Herpes simplex virus  |                              |                  |                        |                         |                |                         |                              |                  |                     |                          |
| Yes (n = 151 [48.6%]) | 54 (35.8)                    | 1                | 35 (23.2)              | <b>1</b>                | 54 (35.8)      | 1                       | 67 (44.4)                    | 1                | 14 (9.3)            | 1                        |
| No (n = 160 [51.4%])  | 62 (38.8)                    | 1.16 (0.72-1.85) | 54 (33.8)              | <b>1.77 (1.07-2.95)</b> | 55 (34.8)      | 0.95 (0.60-1.50)        | 68 (42.5)                    | 0.96 (0.59-1.55) | 11 (6.9)            | 0.66 (0.28-1.55)         |
| EBV                   |                              |                  |                        |                         |                |                         |                              |                  |                     |                          |
| Yes (n = 274 [88.1%]) | 104 (38.0)                   | 1                | 77 (28.1)              | 1                       | 92 (33.4)      | 1                       | 115 (42.0)                   | 1                | 21 (7.7)            | 1                        |
| No (n = 37 [11.9%])   | 12 (32.4)                    | 0.84 (0.40-1.78) | 12 (32.4)              | 1.29 (0.61-2.73)        | 17 (45.9)      | 1.77 (0.87-3.57)        | 20 (54.1)                    | 1.98 (0.97-4.06) | 4 (10.8)            | 1.59 (0.49-5.23)         |
| <i>A lumbricoides</i> |                              |                  |                        |                         |                |                         |                              |                  |                     |                          |
| Yes (n = 45 [14.5%])  | 17 (38.4)                    | 1                | 11 (24.4)              | 1                       | 21 (46.7)      | 1                       | 27 (60.0)                    | <b>1</b>         | 5 (11.1)            | 1                        |
| No (n = 266 [85.5%])  | 99 (37.2)                    | 1.10 (0.56-2.18) | 78 (29.3)              | 1.42 (0.67-3.03)        | 88 (33.1)      | <b>0.47 (0.24-0.93)</b> | 108 (40.6)                   | 0.66 (0.34-1.30) | 20 (7.5)            | 0.62 (0.20-1.95)         |
| <i>T trichiura</i>    |                              |                  |                        |                         |                |                         |                              |                  |                     |                          |
| Yes (n = 28 [9.0%])   | 11 (39.3)                    | 1                | 8 (28.6)               | 1                       | 13 (46.4)      | 1                       | 15 (53.6)                    | 1                | 1 (3.6)             | 1                        |
| No (n = 283 [91.0%])  | 105 (37.1)                   | 1.03 (0.45-2.34) | 81 (28.6)              | 1.06 (0.44-2.57)        | 96 (33.9)      | 0.68 (0.30-1.51)        | 120 (42.4)                   | 0.70 (0.31-1.58) | 24 (8.5)            | 2.77 (0.34-22.56)        |

Boldface numbers are statistically significant.

\*sIgE and SPT results for at least 1 tested allergen.

†Adjusted for sex, age, maternal education, and parental asthma.

**TABLE E2.** Associations between prevalence of infections with sIgE levels, skin reactivity (SPT responses) to aeroallergens, current wheeze, current wheeze plus symptoms and asthma ever in life in children from 6 to 7 years old (n = 483)

| Infections            | sIgE ≥0.70 kU/L* |                  | Positive SPT response* |                         | Current wheeze |                  | Current wheeze plus symptoms |                  | Asthma ever in life |                  |
|-----------------------|------------------|------------------|------------------------|-------------------------|----------------|------------------|------------------------------|------------------|---------------------|------------------|
|                       | No. (%)          | OR (95% CI)†     | No. (%)                | OR (95% CI)†            | No. (%)        | OR (95% CI)†     | No. (%)                      | OR (95% CI)†     | No. (%)             | OR (95% CI)†     |
| <i>T gondii</i>       |                  |                  |                        |                         |                |                  |                              |                  |                     |                  |
| Yes (n = 75 [15.5%])  | 25 (33.3)        | 1                | 18 (24.0)              | 1                       | 16 (21.3)      | 1                | 23 (30.7)                    | 1                | 7 (9.3)             | 1                |
| No (n = 408 [84.5%])  | 160 (39.2)       | 1.28 (0.75-2.17) | 125 (30.6)             | 1.36 (0.76-2.41)        | 85 (20.8)      | 1.00 (0.54-1.84) | 113 (27.7)                   | 0.88 (0.51-1.52) | 29 (7.1)            | 0.78 (0.31-1.93) |
| <i>H pylori</i>       |                  |                  |                        |                         |                |                  |                              |                  |                     |                  |
| Yes (n = 131 [27.1%]) | 48 (36.6)        | 1                | 39 (29.8)              | 1                       | 22 (16.8)      | 1                | 32 (24.4)                    | 1                | 9 (6.9)             | 1                |
| No (n = 352 [72.9%])  | 137 (38.9)       | 1.07 (0.70-1.63) | 104 (29.5)             | 0.98 (0.63-1.52)        | 79 (22.4)      | 1.40 (0.82-2.37) | 104 (29.5)                   | 1.25 (0.79-1.99) | 27 (7.7)            | 1.14 (0.50-2.58) |
| Hepatitis A virus     |                  |                  |                        |                         |                |                  |                              |                  |                     |                  |
| Yes (n = 70 [14.5%])  | 29 (41.4)        | 1                | 20 (28.6)              | 1                       | 15 (21.4)      | 1                | 20 (28.6)                    | 1                | 8 (11.4)            | 1                |
| No (n = 413 [85.5%])  | 156 (37.8)       | 0.85 (0.50-1.45) | 123 (29.8)             | 0.97 (0.55-1.72)        | 86 (20.8)      | 0.95 (0.51-1.78) | 116 (28.1)                   | 0.94 (0.53-1.67) | 28 (6.8)            | 0.45 (0.19-1.10) |
| Herpes zoster virus   |                  |                  |                        |                         |                |                  |                              |                  |                     |                  |
| Yes (n = 221 [45.8%]) | 82 (37.1)        | 1                | 64 (29.0)              | 1                       | 52 (23.5)      | 1                | 67 (30.3)                    | 1                | 14 (6.3)            | 1                |
| No (n = 262 [54.2%])  | 103 (39.3)       | 1.06 (0.73-1.55) | 79 (30.2)              | 1.04 (0.70-1.55)        | 49 (18.7)      | 0.75 (0.48-1.17) | 69 (26.3)                    | 0.82 (0.55-1.23) | 22 (8.4)            | 1.47 (0.71-3.03) |
| Herpes simplex virus  |                  |                  |                        |                         |                |                  |                              |                  |                     |                  |
| Yes (n = 251 [52.0%]) | 91 (36.3)        | 1                | 65 (26.0)              | 1                       | 45 (17.9)      | 1                | 68 (27.1)                    | 1                | 18 (7.2)            | 1                |
| No (n = 232 [48.0%])  | 94 (40.5)        | 1.20 (0.82-1.76) | 78 (33.6)              | 1.36 (0.91-2.03)        | 56 (24.1)      | 1.41 (0.89-2.21) | 68 (29.3)                    | 1.07 (0.71-1.61) | 18 (7.8)            | 0.91 (0.44-1.89) |
| EBV                   |                  |                  |                        |                         |                |                  |                              |                  |                     |                  |
| Yes (n = 421 [87.2%]) | 157 (37.3)       | 1                | 123 (29.2)             | 1                       | 89 (21.1)      | 1                | 117 (27.8)                   | 1                | 32 (7.6)            | 1                |
| No (n = 62 [12.8%])   | 28 (45.2)        | 1.30 (0.75-2.27) | 20 (32.3)              | 1.03 (0.57-1.84)        | 12 (19.4)      | 0.92 (0.46-1.82) | 19 (30.6)                    | 1.15 (0.64-2.08) | 4 (6.5)             | 0.85 (0.28-2.63) |
| <i>A lumbricoides</i> |                  |                  |                        |                         |                |                  |                              |                  |                     |                  |
| Yes (n = 82 [17.0%])  | 29 (35.4)        | 1                | 14 (17.1)              | <b>1</b>                | 15 (18.3)      | 1                | 24 (29.3)                    | 1                | 6 (7.3)             | 1                |
| No (n = 401 [83.0%])  | 156 (38.9)       | 1.18 (0.70-1.99) | 129 (32.2)             | <b>2.09 (1.12-3.91)</b> | 86 (21.4)      | 1.34 (0.71-2.52) | 112 (27.9)                   | 0.97 (0.56-1.67) | 30 (7.5)            | 1.02 (0.39-2.68) |
| <i>T trichiura</i>    |                  |                  |                        |                         |                |                  |                              |                  |                     |                  |
| Yes (n = 55 [11.4%])  | 18 (32.7)        | 1                | 8 (14.5)               | <b>1</b>                | 10 (18.2)      | 1                | 15 (27.3)                    | 1                | 4 (7.3)             | 1                |
| No (n = 428 [88.6%])  | 167 (39.0)       | 1.38 (0.74-2.54) | 135 (31.5)             | <b>2.52 (1.15-5.52)</b> | 91 (21.3)      | 1.29 (0.62-2.70) | 121 (28.3)                   | 1.08 (0.57-2.05) | 32 (7.5)            | 0.98 (0.32-3.06) |

Boldface numbers are statistically significant.

\*sIgE and SPT results for at least 1 tested allergen.

†Adjusted for sex, age, maternal education, and parental asthma.

**TABLE E3.** Associations between prevalence of infections with specific IgE levels (sIgE), skin reactivity (SPT responses) to aeroallergens, current wheeze, current wheeze plus symptoms, and asthma ever in life in children 7 to 11 years old (n = 388)

| Infections            | sIgE $\geq 0.70$ kU/L* |                         | Positive SPT response* |                         | Current wheeze |                  | Current wheeze plus symptoms |                  | Asthma ever in life |                   |
|-----------------------|------------------------|-------------------------|------------------------|-------------------------|----------------|------------------|------------------------------|------------------|---------------------|-------------------|
|                       | No. (%)                | OR (95% CI)†            | No. (%)                | OR (95% CI)†            | No. (%)        | OR (95% CI)†     | No. (%)                      | OR (95% CI)†     | No. (%)             | OR (95% CI)†      |
| <i>T gondii</i>       |                        |                         |                        |                         |                |                  |                              |                  |                     |                   |
| Yes (n = 98 [25.3%])  | 26 (26.5)              | <b>1</b>                | 20 (20.4)              | <b>1</b>                | 16 (16.3)      | <b>1</b>         | 23 (23.5)                    | <b>1</b>         | 6 (6.1)             | <b>1</b>          |
| No (n = 290 [74.7%])  | 121 (41.7)             | <b>1.98 (1.18-3.31)</b> | 107 (36.9)             | <b>2.32 (1.33-4.03)</b> | 37 (12.8)      | 0.77 (0.40-1.47) | 50 (17.2)                    | 0.69 (0.39-1.23) | 13 (4.5)            | 0.65 (0.24-1.80)  |
| <i>H pylori</i>       |                        |                         |                        |                         |                |                  |                              |                  |                     |                   |
| Yes (n = 129 [33.2%]) | 42 (32.6)              | <b>1</b>                | 36 (27.9)              | <b>1</b>                | 13 (10.1)      | <b>1</b>         | 21 (16.3)                    | <b>1</b>         | 3 (2.3)             | <b>1</b>          |
| No (n = 259 [66.8%])  | 105 (40.5)             | 1.50 (0.95-2.36)        | 91 (35.1)              | 1.44 (0.90-2.31)        | 40 (15.4)      | 1.73 (0.88-3.40) | 52 (20.1)                    | 1.38 (0.78-2.44) | 16 (6.2)            | 2.80 (0.79-9.89)  |
| Hepatitis A virus     |                        |                         |                        |                         |                |                  |                              |                  |                     |                   |
| Yes (n = 82 [21.1%])  | 29 (35.4)              | <b>1</b>                | 23 (28.0)              | <b>1</b>                | 11 (13.4)      | <b>1</b>         | 15 (18.3)                    | <b>1</b>         | 4 (4.9)             | <b>1</b>          |
| No (n = 306 [78.9%])  | 118 (38.6)             | 1.11 (0.66-1.86)        | 104 (34.0)             | 1.26 (0.73-2.18)        | 42 (13.7)      | 1.19 (0.57-2.48) | 58 (19.0)                    | 1.25 (0.65-2.40) | 15 (4.9)            | 1.03 (0.33-3.25)  |
| Herpes zoster virus   |                        |                         |                        |                         |                |                  |                              |                  |                     |                   |
| Yes (n = 212 [54.6%]) | 87 (41.0)              | <b>1</b>                | 66 (31.1)              | <b>1</b>                | 30 (14.2)      | <b>1</b>         | 43 (20.3)                    | <b>1</b>         | 13 (6.13)           | <b>1</b>          |
| No (n = 176 [45.4%])  | 60 (34.1)              | 0.76 (0.50-1.16)        | 61 (34.7)              | 1.20 (0.78-1.85)        | 23 (13.1)      | 0.97 (0.53-1.75) | 30 (17.0)                    | 0.85 (0.50-1.45) | 6 (3.4)             | 0.56 (0.20-1.51)  |
| Herpes simplex virus  |                        |                         |                        |                         |                |                  |                              |                  |                     |                   |
| Yes (n = 242 [62.4%]) | 87 (36.0)              | <b>1</b>                | 71 (29.3)              | <b>1</b>                | 35 (14.5)      | <b>1</b>         | 49 (20.2)                    | <b>1</b>         | 11 (4.5)            | <b>1</b>          |
| No (n = 146 [37.6%])  | 60 (41.1)              | 1.20 (0.78-1.86)        | 56 (38.4)              | 1.45 (0.94-2.26)        | 18 (12.3)      | 0.92 (0.50-1.72) | 24 (16.4)                    | 0.87 (0.50-1.52) | 8 (5.5)             | 1.19 (0.46-3.09)  |
| EBV                   |                        |                         |                        |                         |                |                  |                              |                  |                     |                   |
| Yes (n = 351 [90.5%]) | 125 (35.6)             | <b>1</b>                | 104 (29.6)             | <b>1</b>                | 48 (13.7)      | <b>1</b>         | 64 (18.2)                    | <b>1</b>         | 15 (4.3)            | <b>1</b>          |
| No (n = 37 [9.5%])    | 22 (59.5)              | <b>2.66 (1.31-5.40)</b> | 23 (62.2)              | <b>3.84 (1.88-7.83)</b> | 5 (13.5)       | 1.06 (0.39-2.90) | 9 (24.3)                     | 1.63 (0.71-3.72) | 4 (10.8)            | 2.53 (0.78-8.28)  |
| <i>A lumbricoides</i> |                        |                         |                        |                         |                |                  |                              |                  |                     |                   |
| Yes (n = 63 [16.2%])  | 27 (42.9)              | <b>1</b>                | 18 (28.6)              | <b>1</b>                | 13 (20.6)      | <b>1</b>         | 17 (27.0)                    | <b>1</b>         | 1 (1.6)             | <b>1</b>          |
| No (n = 325 [83.8%])  | 120 (36.9)             | 0.78 (0.44-1.39)        | 109 (33.5)             | 1.24 (0.67-2.29)        | 40 (12.3)      | 0.66 (0.32-1.37) | 56 (17.2)                    | 0.72 (0.37-1.38) | 18 (5.5)            | 4.08 (0.51-32.48) |
| <i>T trichiura</i>    |                        |                         |                        |                         |                |                  |                              |                  |                     |                   |
| Yes (n = 45 [11.6%])  | 15 (33.3)              | <b>1</b>                | 15 (33.3)              | <b>1</b>                | 7 (15.6)       | <b>1</b>         | 9 (20.0)                     | <b>1</b>         | 3 (6.7)             | <b>1</b>          |
| No (n = 343 [88.4%])  | 132 (38.5)             | 1.32 (0.67-2.62)        | 112 (32.7)             | 1.01 (0.51-2.00)        | 46 (13.4)      | 0.90 (0.37-2.19) | 64 (18.7)                    | 0.99 (0.44-2.23) | 16 (4.7)            | 0.50 (0.13-1.94)  |

Boldface numbers are statistically significant.

\*sIgE and SPT results for at least 1 tested allergen.

†Adjusted for sex, age, maternal education, and parental asthma.
